# Supplementary material for: Effect of a Semirigid Ankle Brace on the In Vivo Kinematics of Patients with Functional Ankle Instability during the Stance Phase of Walking
Source: Hindawi journal article supplement (doi:10.1155/2019/4398469), 2019-04-08

Table 3 Joint Motion Difference of the Talocrural and Subtalar Joints from Heel-strike to Mid-stance during the Stance Phase of Walking

|                | Joint Motion Difference 1 |            |           |                   |            |            |                |            |            |                   |            |           |
|----------------|---------------------------|------------|-----------|-------------------|------------|------------|----------------|------------|------------|-------------------|------------|-----------|
|                | Talocrural Joint          |            |           |                   |            |            | Subtalar Joint |            |            |                   |            |           |
|                | Rotation (°)              |            |           | Displacement (mm) |            |            | Rotation (°)   |            |            | Displacement (mm) |            |           |
|                | DF+/PF-                   | EV+/IV-    | ER+/IR-   | A+/P-             | L+/M-      | P+/D-      | DF+/PF-        | EV+/IV-    | ER+/IR-    | A+/P-             | L+/M-      | P+/D-     |
| Normal         | 1.74±4.03                 | 3.99±1.96  | 8.00±2.52 | 0.07±0.50         | -0.16±0.93 | 0.17±0.70  | 3.76±2.43      | 4.43±4.15  | 4.69±3.09  | -1.05±1.43        | 0.42±1.01  | 0.71±0.50 |
| FAI            | 2.29±4.94                 | 0.76±1.95  | 9.26±2.98 | -0.10±0.61        | -0.16±1.35 | 0.01±0.50  | 4.55±2.29      | 6.63±3.57  | 4.72±4.56  | -1.21±0.55        | -0.29±1.98 | 0.85±1.09 |
| FAI with Brace | -3.18±4.06                | -0.67±1.86 | 3.98±5.49 | -0.14±0.43        | 0.53±1.48  | -0.30±0.93 | -5.34±2.81     | -0.68±5.60 | -2.77±2.33 | -1.65±0.99        | -0.25±4.01 | 1.06±1.14 |

DF/PF, dorsiflexion/plantarflexion; EV/IV, eversion/inversion; ER/IR, external rotation/internal rotation; A/P, Anterior/posterior displacement; L/M, lateral/medial displacement; P/D, proximal/distal displacement.

Table 4 Joint Motion Difference of the Talocrural and Subtalar Joints from Mid-stance to Toe-off during the Stance Phase of Walking

|                | Joint Motion Difference 2 |           |            |                   |            |           |                |             |            |                   |            |            |
|----------------|---------------------------|-----------|------------|-------------------|------------|-----------|----------------|-------------|------------|-------------------|------------|------------|
|                | Talocrural Joint          |           |            |                   |            |           | Subtalar Joint |             |            |                   |            |            |
|                | Rotation (°)              |           |            | Displacement (mm) |            |           | Rotation (°)   |             |            | Displacement (mm) |            |            |
|                | DF+/PF-                   | EV+/IV-   | ER+/IR-    | A+/P-             | L+/M-      | P+/D-     | DF+/PF-        | EV+/IV-     | ER+/IR-    | A+/P-             | L+/M-      | P+/D-      |
| Normal         | 4.75±5.09                 | 0.38±2.51 | 0.92±3.23  | -0.11±0.45        | -0.08±0.45 | 0.33±0.92 | -6.49±3.55     | -6.58±3.94  | -3.96±3.35 | 2.22±0.92         | -0.37±1.64 | -1.18±0.92 |
| FAI            | 4.74±7.45                 | 1.48±2.31 | 2.10±2.98  | 0.55±0.60         | -0.26±0.81 | 0.49±0.57 | -4.65±2.95     | -11.96±3.19 | -4.50±3.81 | 1.26±1.04         | 2.22±1.89  | -0.69±1.24 |
| FAI with Brace | -4.82±5.86                | 1.06±1.40 | -1.90±4.09 | -0.55±0.85        | -0.13±2.24 | 0.99±0.78 | 5.29±3.37      | 0.54±5.86   | 1.72±3.46  | 1.63±1.38         | 0.68±3.01  | -0.57±1.27 |

DF/PF, dorsiflexion/plantarflexion; EV/IV, eversion/inversion; ER/IR, external rotation/internal rotation; A/P, Anterior/posterior displacement; L/M, lateral/medial displacement; P/D, proximal/distal displacement.

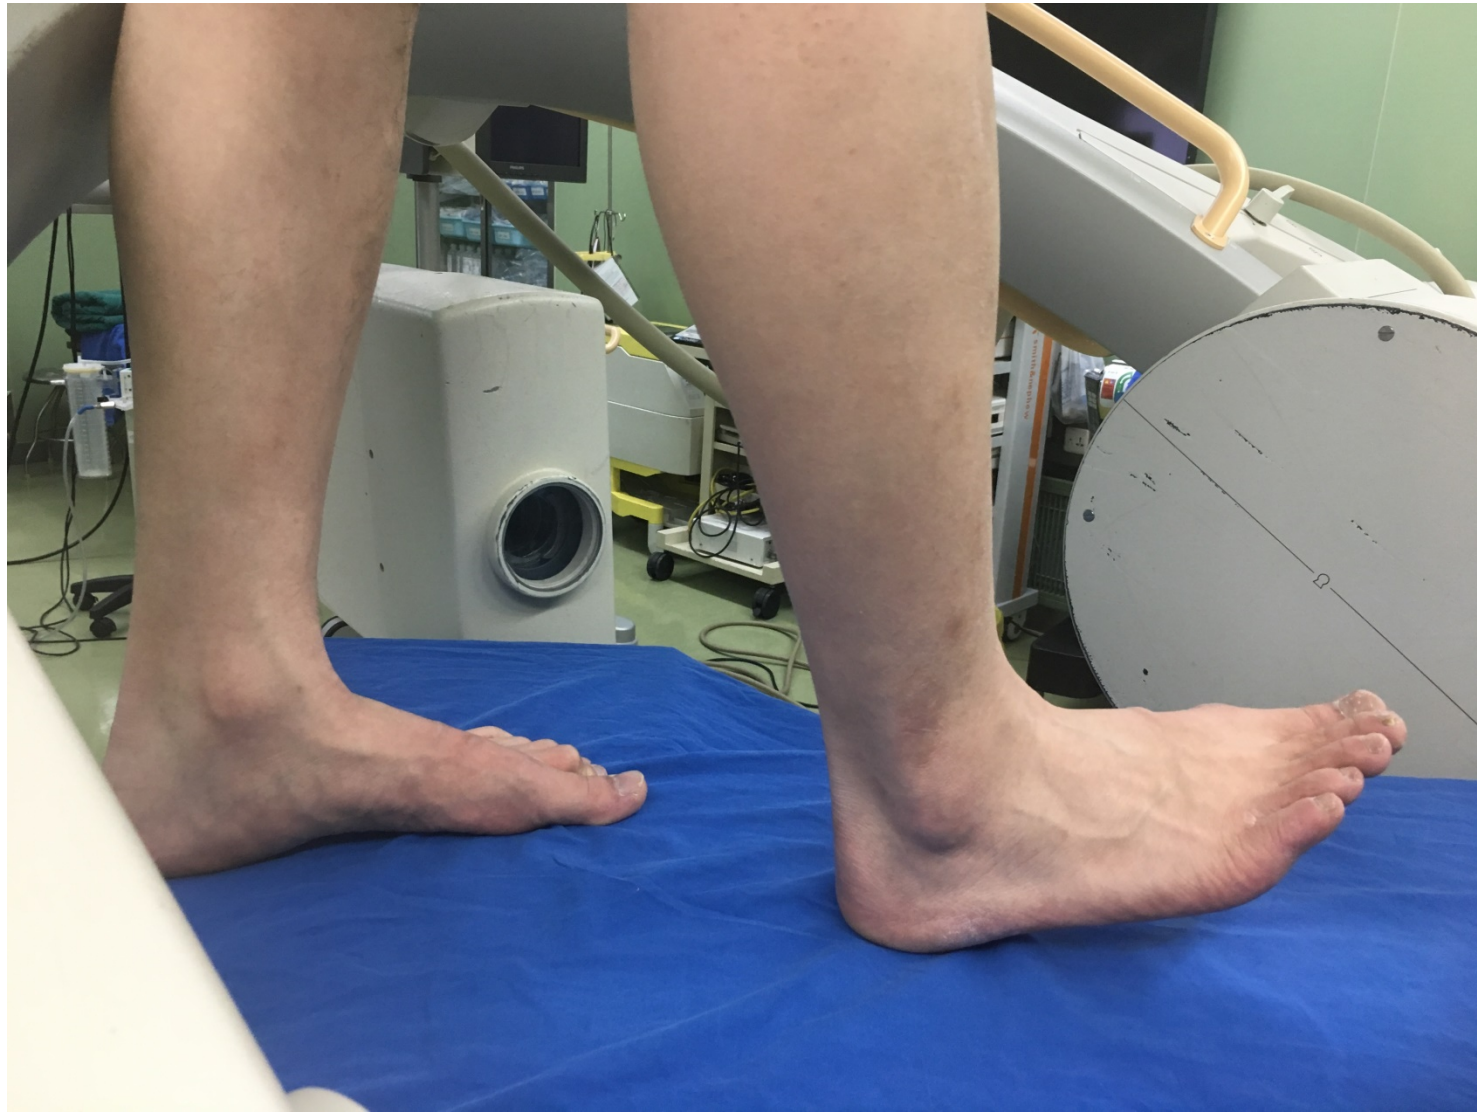

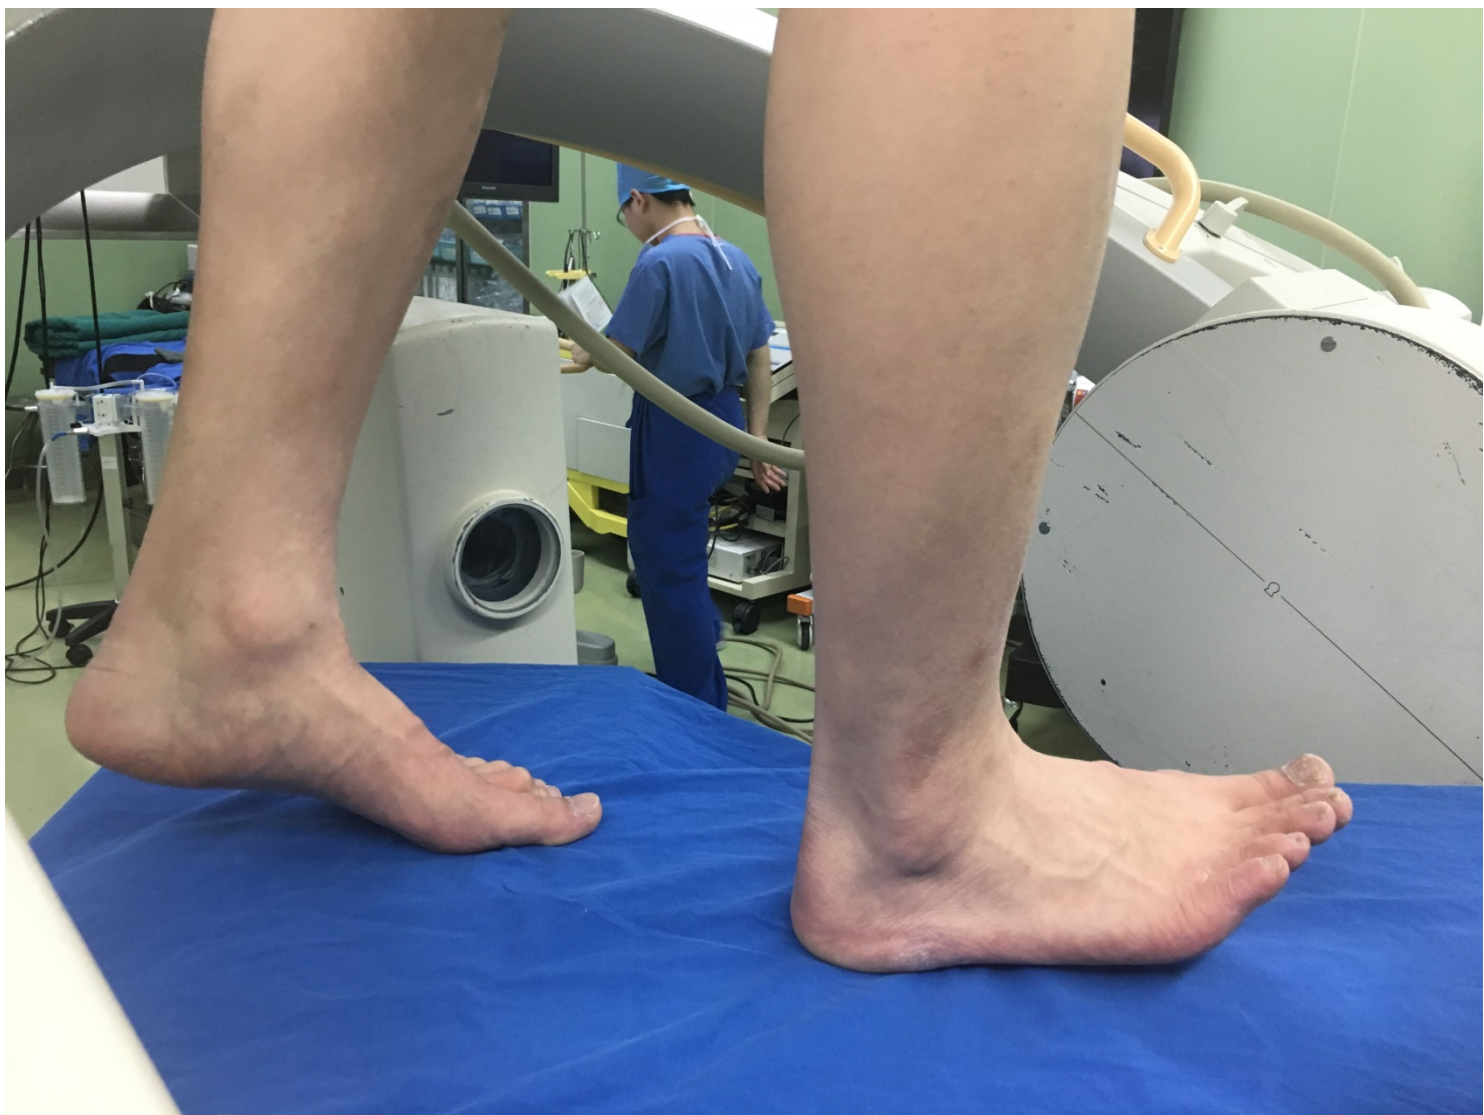



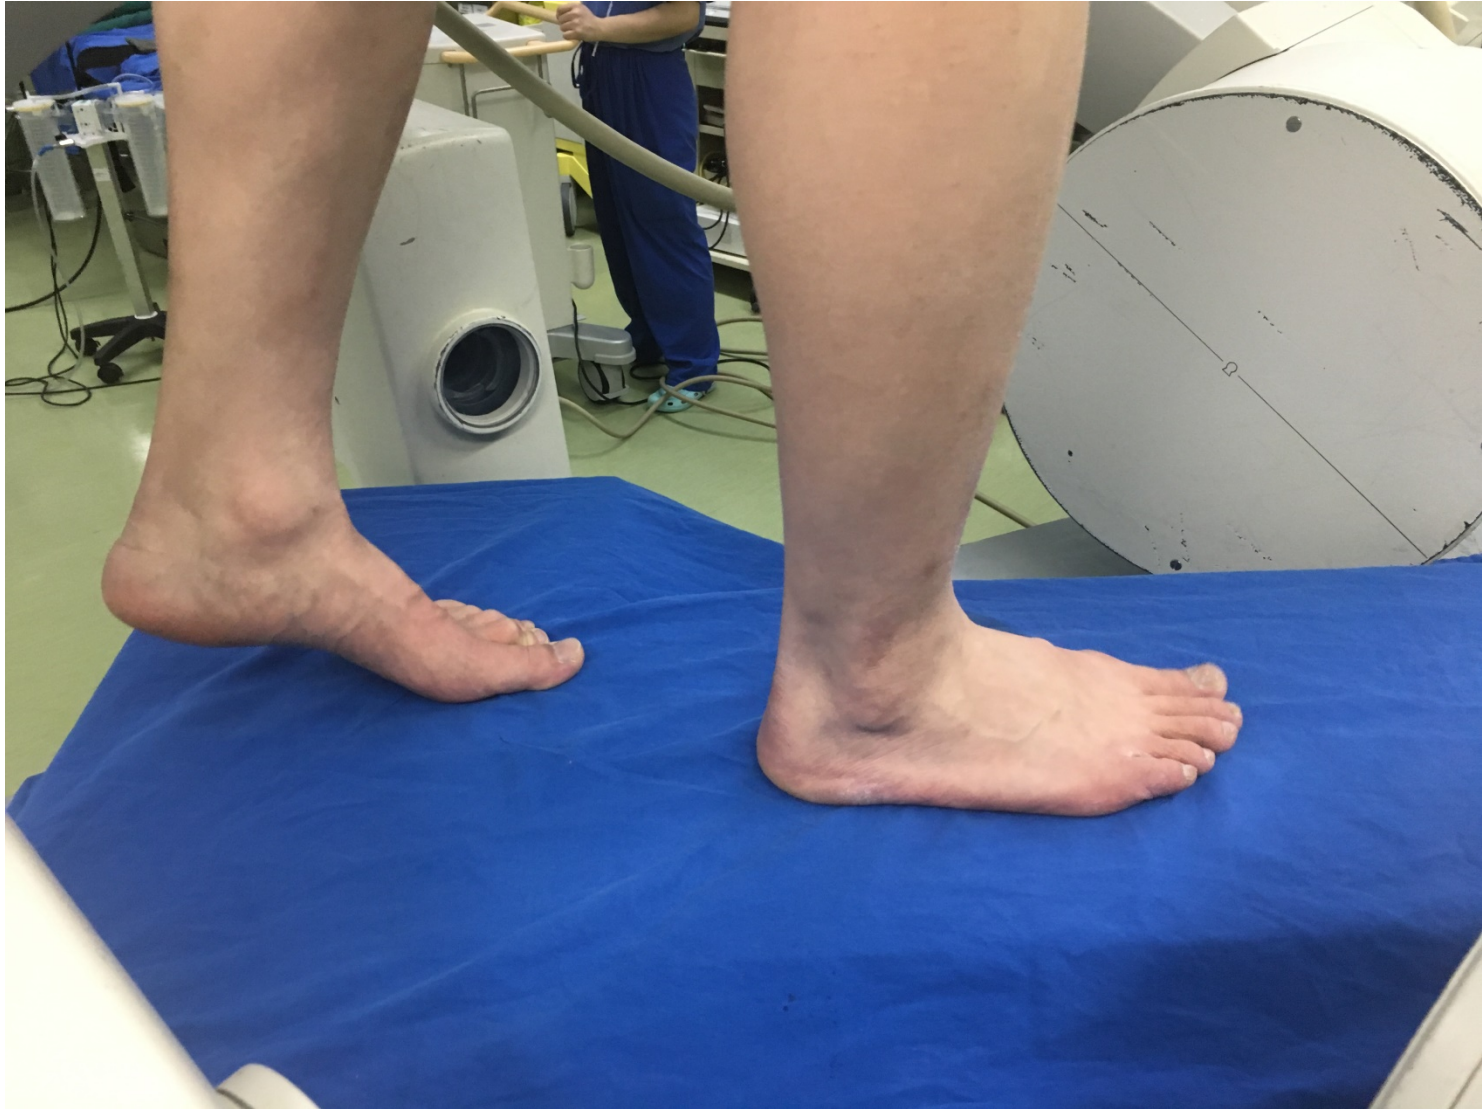

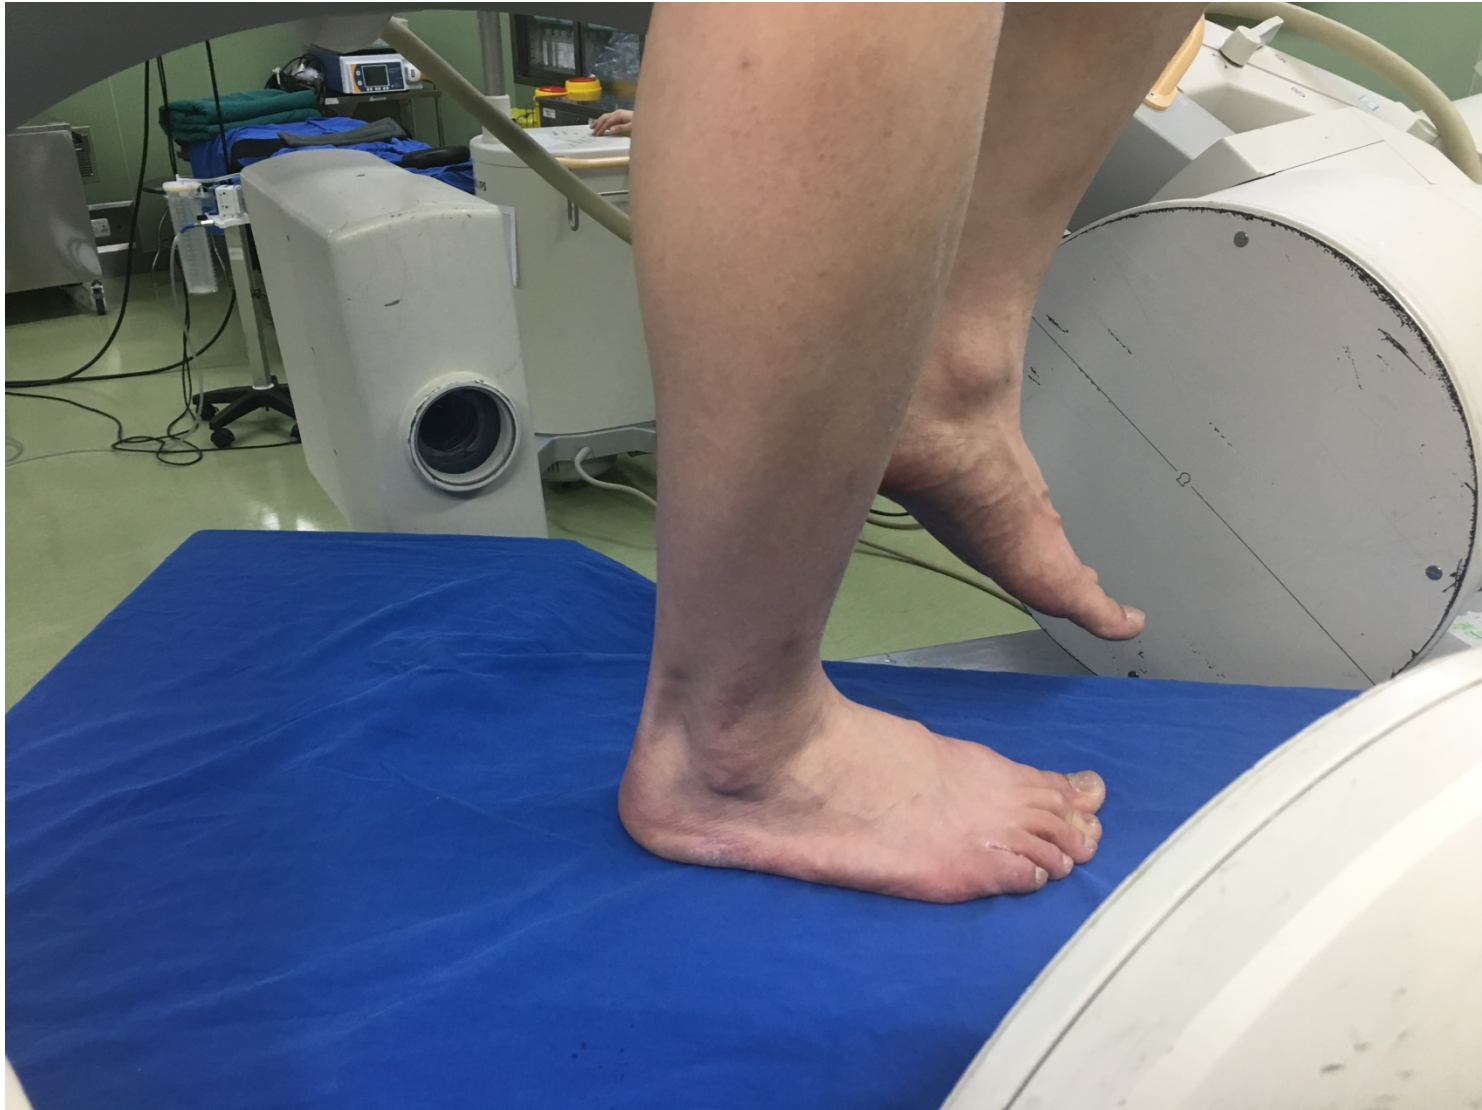



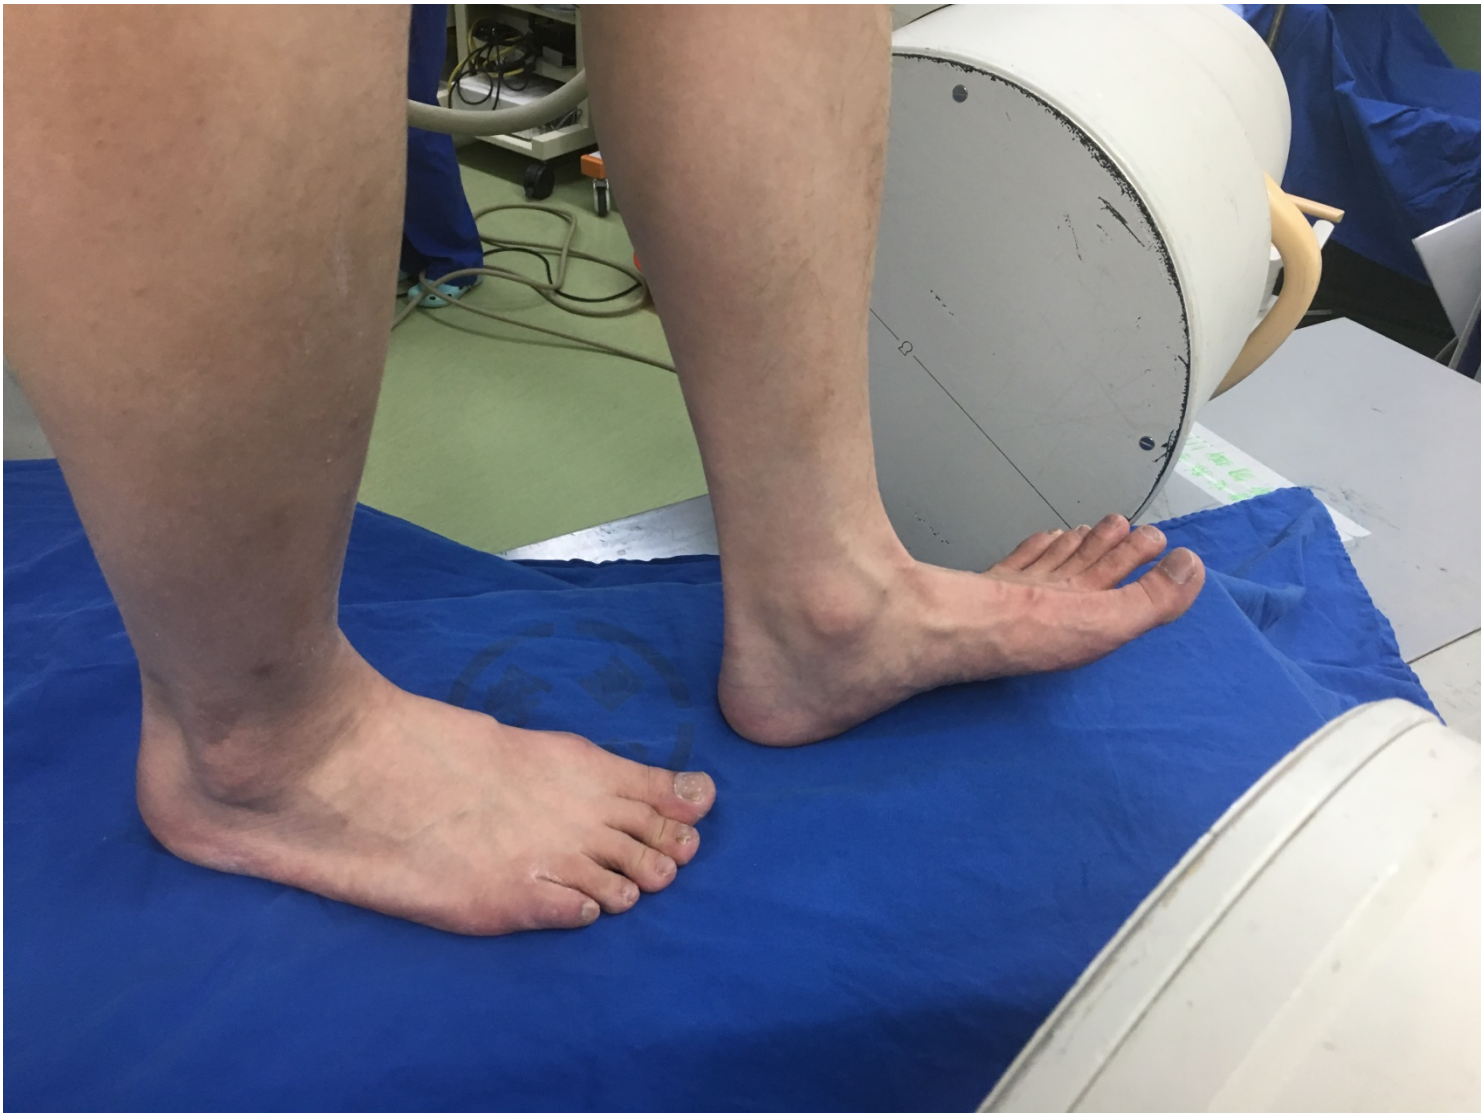

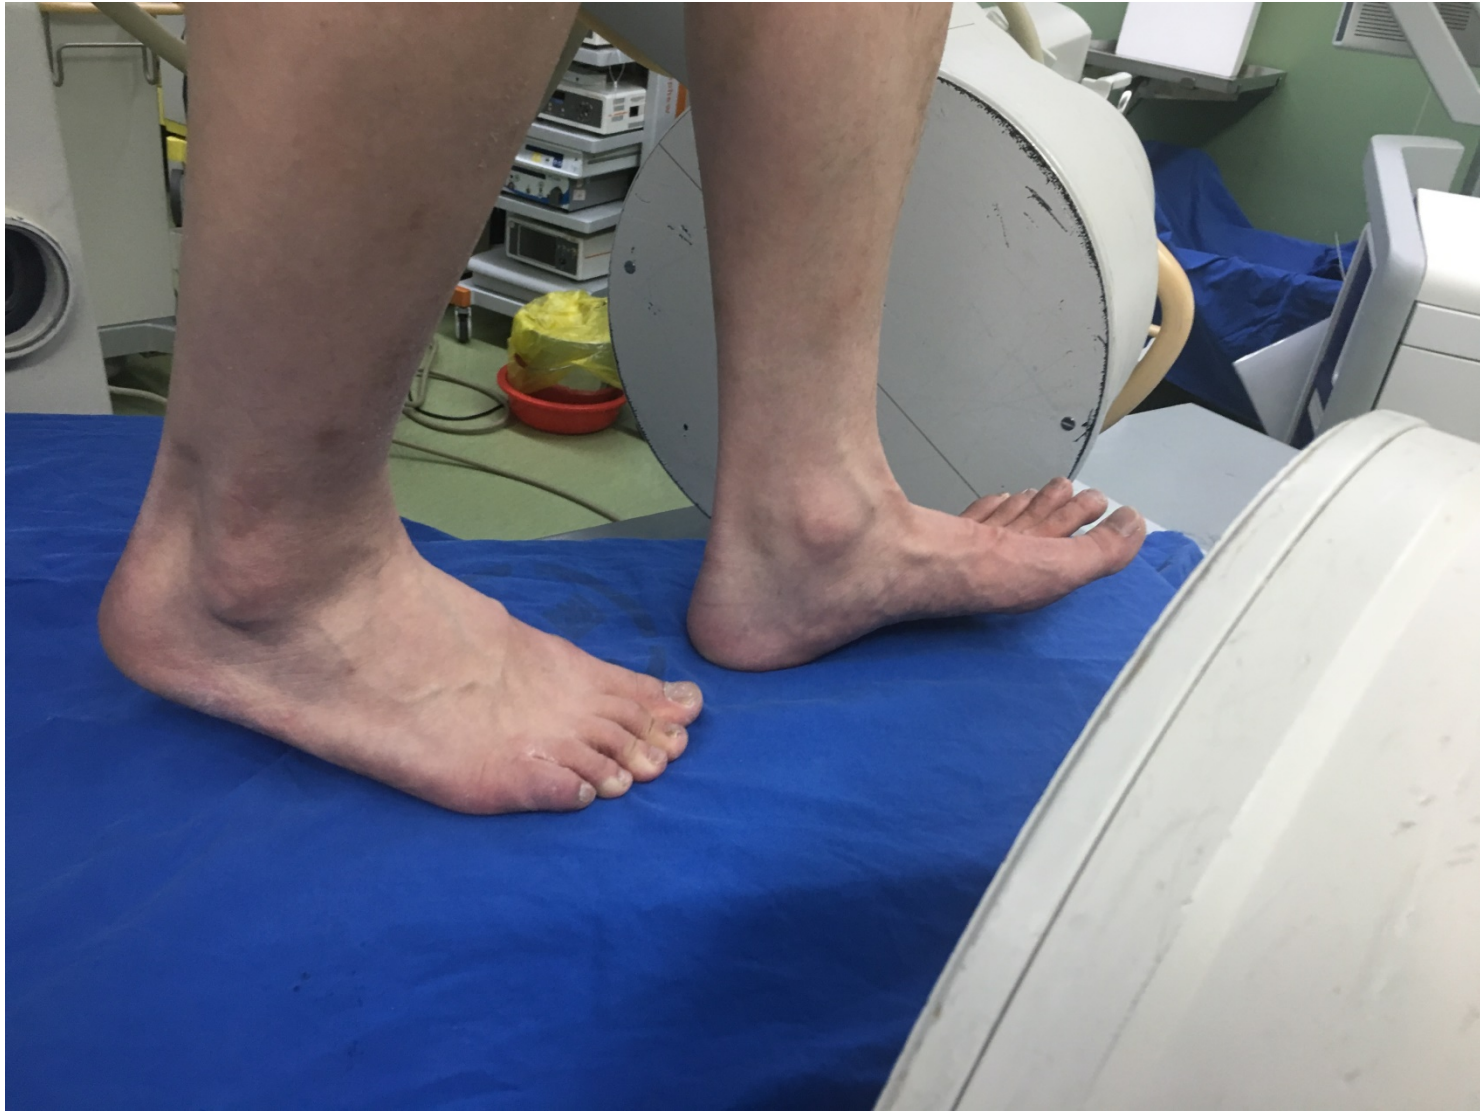



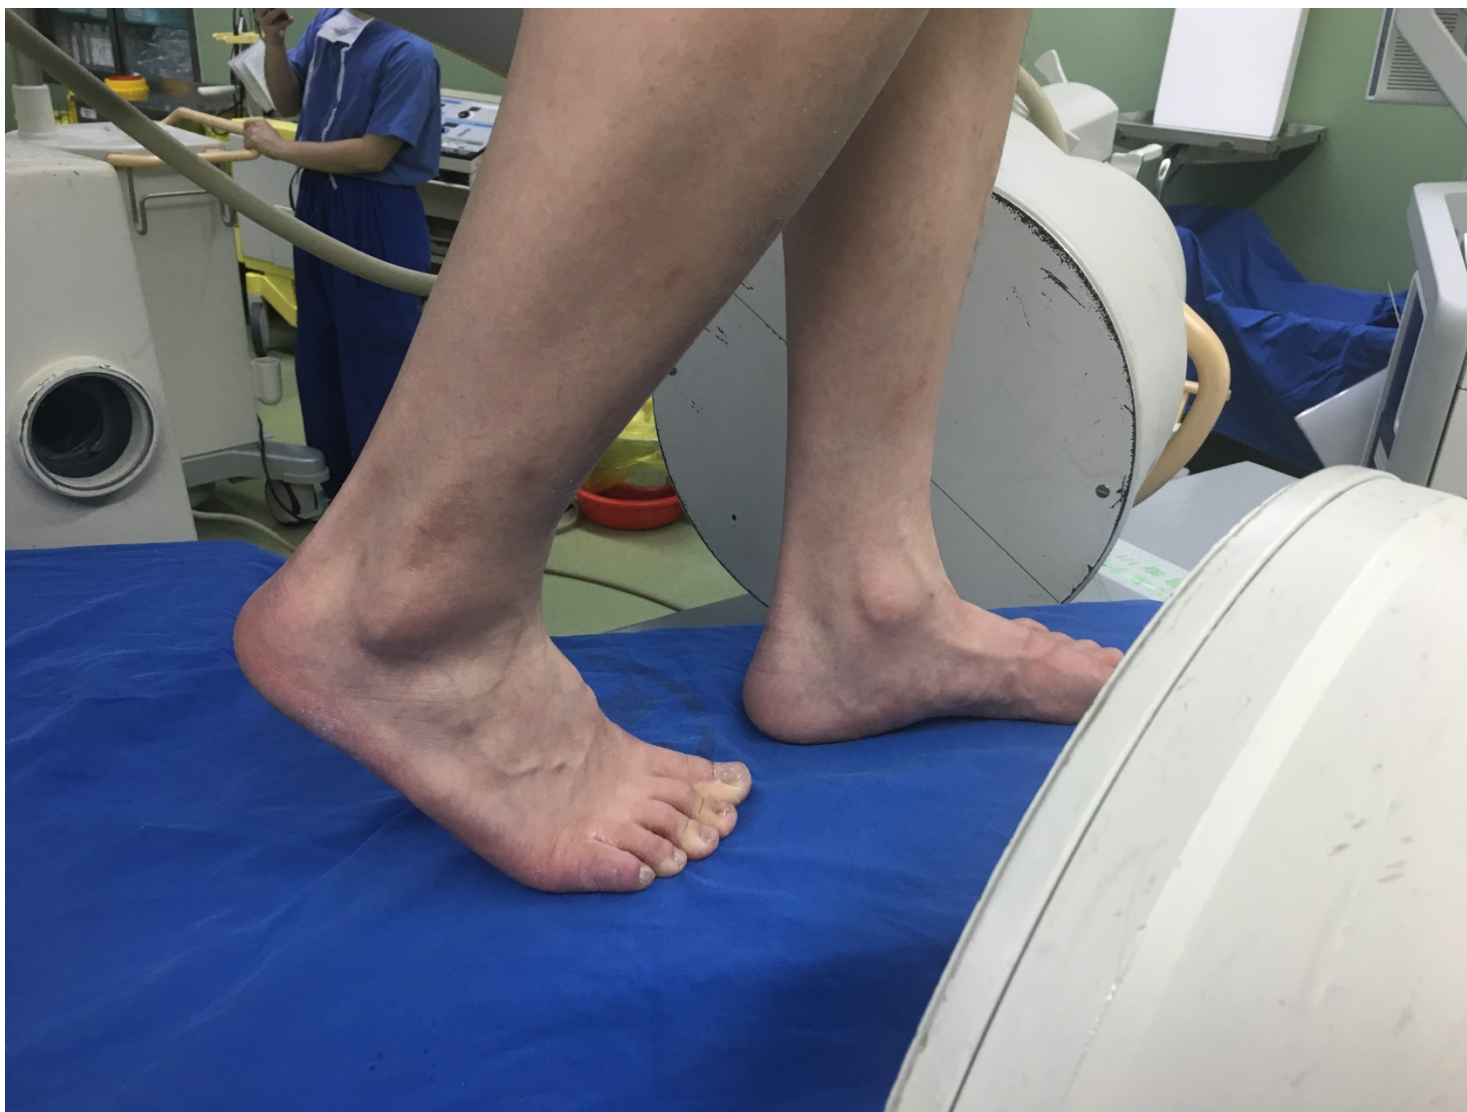

Supplement: f1 [file 4398469.f1.pdf]
